# Supplementary material for: Magnetic properties of two coordination isomeric cobalt(ii) single-ion magnets
Source: Royal Society of Chemistry journal article supplement (doi:10.1039/d3dt01105d), 2023-01-01
Supplement: d3dt01105d1.pdf [file d3dt01105d1.pdf]

Supporting Information for

**Magnetic properties in two coordination isomeric cobalt(II) single-ion magnets**

Hui-Hui Cui,<sup>\*a</sup> Hong-Juan Xu,<sup>a</sup> Tengkun Zhang,<sup>a</sup> Shuchang Luo,<sup>\*b</sup> Wei Tong,<sup>c</sup> Miao Wang,<sup>a</sup> Jin Wang,<sup>a</sup> Lei Chen,<sup>d</sup> Yanfeng Tang<sup>\*a</sup>

<sup>a</sup>*School of Chemistry and Chemical Engineering, Nantong University, Jiangsu 226019, P. R. China.*

<sup>b</sup>*School of Chemical Engineering, Guizhou University of Engineering Science, Bijie, 551700, China.*

<sup>c</sup>*Anhui Province Key Laboratory of Condensed Matter Physics at Extreme Conditions, High Magnetic Field Laboratory of the Chinese Academy of Science, Hefei 230031, Anhui, China*

<sup>d</sup>*School of Environmental and Chemical Engineering, Jiangsu University of Science and Technology, Zhenjiang 212003, P. R. China*

**Table S1.** Summary of six- and seven-coordinate Co(II)-SIMs with N<sub>2</sub>O<sub>4</sub> and N<sub>3</sub>O<sub>4</sub> donor sets.

| compound                                                                                                                                      | Donor set                     | coordinated geometry | $\tau$          | $D/\text{cm}^{-1}$ | $E/D$  | $H_{dc}/Oe$ | $U_{\text{eff}}/\text{cm}^{-1}$ | Ref |
|-----------------------------------------------------------------------------------------------------------------------------------------------|-------------------------------|----------------------|-----------------|--------------------|--------|-------------|---------------------------------|-----|
| [(L1) <sub>4</sub> Co <sub>3</sub> (H <sub>2</sub> O) <sub>2</sub> ](NO <sub>3</sub> ) <sub>4</sub> ·CH <sub>3</sub> O<br>H·5H <sub>2</sub> O | N <sub>2</sub> O <sub>4</sub> | octahedron           | 0.724           | 20.8(7)            | 0      | 1000        | /                               | S1  |
| [(L2) <sub>4</sub> Co <sub>3</sub> (H <sub>2</sub> O) <sub>2</sub> ](NO <sub>3</sub> ) <sub>4</sub> ·6H <sub>2</sub> O                        | N <sub>2</sub> O <sub>4</sub> | octahedron           | 1.083           | 29.8(8)            | 0.02   | 1000        | 5.46                            | S1  |
| Co <sup>II</sup> Y <sup>III</sup> (L3)(DBM) <sub>3</sub>                                                                                      | N <sub>2</sub> O <sub>4</sub> | octahedron           | 1.923           | 10.3               | 0      | 2000        | 5.95                            | S2  |
| Co(9Accm) <sub>2</sub> (py) <sub>2</sub>                                                                                                      | N <sub>2</sub> O <sub>4</sub> | octahedron           | 0.203           | 74.1               | 0.01   | 1500        | /                               | S3  |
| Co(9Accm) <sub>2</sub> (2,2'-bpy)                                                                                                             | N <sub>2</sub> O <sub>4</sub> | octahedron           | 0.761           | 24.1               | -0.07  | 700         | /                               | S3  |
| Co(3,5-dnb) <sub>2</sub> (py) <sub>2</sub> (H <sub>2</sub> O) <sub>2</sub>                                                                    | N <sub>2</sub> O <sub>4</sub> | octahedron           | 0.169           | 58                 | 0      | 1000        | 19.5                            | S4  |
| Co(3,5-dnb) <sub>2</sub> (py) <sub>2</sub> (H <sub>2</sub> O) <sub>2</sub>                                                                    | N <sub>2</sub> O <sub>4</sub> | octahedron           | 0.088           | 68                 | 0.22   | 1000        | 21.1                            | S4  |
| Co(H <sub>2</sub> O) <sub>2</sub> (CH <sub>3</sub> COO) <sub>2</sub> (C <sub>5</sub> H <sub>5</sub> N) <sub>2</sub>                           | N <sub>2</sub> O <sub>4</sub> | octahedron           | 0.072           | /                  | /      | 1500        | 25                              | S5  |
| [Co(pydm) <sub>2</sub> ](dnbz) <sub>2</sub>                                                                                                   | N <sub>2</sub> O <sub>4</sub> | octahedron           | 4.304           | -94.8 <sup>a</sup> | 0.12   | 2000        | 39                              | S6  |
| [Co(pydca)(dmpy)] <sub>2</sub> ·H <sub>2</sub> O                                                                                              | N <sub>2</sub> O <sub>4</sub> | octahedron           | 4.504           | 55                 | 0.34   | 4000        | /                               | S7  |
|                                                                                                                                               |                               |                      | 5.162           |                    |        |             |                                 |     |
| Co(1-napH) <sub>2</sub> (4,4'-bpy) <sub>2</sub> (H <sub>2</sub> O) <sub>2</sub>                                                               | N <sub>2</sub> O <sub>4</sub> | octahedron           | 0.122           | 89.5               | 0      | 1500        | 21.26                           | S8  |
| Co(neo)(piv) <sub>2</sub>                                                                                                                     | N <sub>2</sub> O <sub>4</sub> | octahedron           | 7.650           | /                  | /      | 1000        | 13.20                           | S9  |
| [Co(neo)(4OH-benz) <sub>2</sub> ] <sub>2</sub> ·2CH <sub>3</sub> OH                                                                           | N <sub>2</sub> O <sub>4</sub> | octahedron           | 6.352           | /                  | /      | 1000        | 12.16                           | S9  |
| Co(H <sub>2</sub> DPA) <sub>2</sub> ·H <sub>2</sub> O                                                                                         | N <sub>2</sub> O <sub>4</sub> | octahedron           | 2.918           | 67.63              | -0.24  | 1500        | 30.08                           | S10 |
| [Co(hfa) <sub>2</sub> (pic) <sub>2</sub> ]                                                                                                    | N <sub>2</sub> O <sub>4</sub> | octahedron           | 0.694           | 24.17              | 0.285  | 2000        | 17.38                           | S11 |
| [Co(μ-L4)(μCCl <sub>3</sub> COO)Y(NO <sub>3</sub> ) <sub>2</sub> ] <sub>2</sub> ·2CHCl <sub>3</sub> ·CH <sub>3</sub> CN·2H <sub>2</sub> O     | N <sub>2</sub> O <sub>4</sub> | octahedron           | 0.758           | 91.37              | 0.25   | 1200        | 5.88                            | S12 |
| [Co(μ-L4)(μ-CH <sub>3</sub> COO)Y(NO <sub>3</sub> ) <sub>2</sub> ] <sub>2</sub> ·CH <sub>3</sub> CN                                           | N <sub>2</sub> O <sub>4</sub> | octahedron           | 0.763           | 87.9               | 0.132  | 1200        | 7.65                            | S12 |
| [Co(μ-L4)(μPhCOO)Y(NO <sub>3</sub> ) <sub>2</sub> ] <sub>2</sub> ·3CH <sub>3</sub> CN·2H <sub>2</sub> O                                       | N <sub>2</sub> O <sub>4</sub> | octahedron           | 0.800           | 90.02              | 0.206  | 1200        | 9.52                            | S12 |
| [Co(μ-L4)(μtBuCOO)Y(NO <sub>3</sub> ) <sub>2</sub> ] <sub>2</sub> ·CHCl <sub>3</sub> ·2H <sub>2</sub> O                                       | N <sub>2</sub> O <sub>4</sub> | octahedron           | 0.859           | 72.42              | 0.253  | 1200        | 12.99                           | S12 |
| [Co(hfac) <sub>2</sub> L5]·CH <sub>3</sub> CN                                                                                                 | N <sub>2</sub> O <sub>4</sub> | octahedron           | 0.507           | /                  | /      | 1000        | 5.8                             | S13 |
| [Co(pydm) <sub>2</sub> ](mdnbz) <sub>2</sub>                                                                                                  | N <sub>2</sub> O <sub>4</sub> | octahedron           | 3.200           | 50                 | 0.204  | 2500        | /                               | S14 |
| [Co(hfac) <sub>2</sub> (MeCN) <sub>2</sub> ]                                                                                                  | N <sub>2</sub> O <sub>4</sub> | octahedron           | 0.062           | 64.46              | 0.036  | 1000        | 8.8                             | S15 |
| [Co(hfac) <sub>2</sub> (Spy) <sub>2</sub> ]                                                                                                   | N <sub>2</sub> O <sub>4</sub> | octahedron           | 0.051           | 59.78              | 0.030  | 1400        | 14.5                            | S15 |
| [Co(hfac) <sub>2</sub> (MBIm) <sub>2</sub> ]                                                                                                  | N <sub>2</sub> O <sub>4</sub> | octahedron           | 0.096           | 67.65              | -0.034 | 1000        | 16.7                            | S15 |
| [Co(L6) <sub>2</sub> (H <sub>2</sub> O) <sub>2</sub> ]                                                                                        | N <sub>2</sub> O <sub>4</sub> | octahedron           | 0.312           | -28.78             | -0.281 | 800         | 30.37                           | S16 |
| [Co(HL7) <sub>2</sub> ](ClO <sub>4</sub> ) <sub>2</sub> ·2H <sub>2</sub> O                                                                    | N <sub>2</sub> O <sub>4</sub> | octahedron           | 2.491           | -23.8              | -0.294 | 800         | 13.7                            | S17 |
| [Co(2,6-dfba) <sub>2</sub> (bpp) <sub>2</sub> (H <sub>2</sub> O) <sub>2</sub> ] <sub>n</sub>                                                  | N <sub>2</sub> O <sub>4</sub> | octahedron           | 0.025/<br>0.076 | 53.19              | 0.144  | 2000        | 19.8                            | S18 |

|                                                                                                         |                               |                    |       |       |       |      |        |     |
|---------------------------------------------------------------------------------------------------------|-------------------------------|--------------------|-------|-------|-------|------|--------|-----|
| [Co(2,6-dfba) <sub>2</sub> (bpe) <sub>2</sub> (H <sub>2</sub> O) <sub>2</sub> ] <sub>n</sub>            | N <sub>2</sub> O <sub>4</sub> | octahedron         | 0.117 | 65.67 | 0.068 | 2000 | 15.4   | S18 |
| [Co(neo)(ac) <sub>2</sub> ]                                                                             | N <sub>2</sub> O <sub>4</sub> | trigonal prism     | 3.761 | /     | /     | 1000 | 26.201 | S9  |
| [CoL <sub>8</sub> (H <sub>2</sub> O) <sub>2</sub> ] <sub>2</sub> ·2H <sub>2</sub> O·2CH <sub>3</sub> OH | N <sub>2</sub> O <sub>4</sub> | trigonal antiprism | /     | /     | /     | 1500 | 38.25  | S19 |
| [CoL <sub>8</sub> (CH <sub>3</sub> CH <sub>2</sub> O) <sub>2</sub> ]                                    | N <sub>2</sub> O <sub>4</sub> | trigonal antiprism | /     | /     | /     | 600  | 37.56  | S19 |

a: The ZFS parameters were obtained from the theoretical calculation.

L1 = 4-imidazocarboxylate-2-pyrazine carbohydrozone; L2 = pyridine-2-carboxylate-2-pyrazine carbohydrozone; H<sub>2</sub>L3 = N,N'-dimethyl-N,N'-(2-hydroxy-3-methoxy-5-methyl-benzyl)ethylenediamine; DBM<sup>-</sup> = anion of 1,3-Diphenyl-propane-1,3-dione; 9Accm = 1,7-(di-9-anthracene-1,6-heptadiene-3,5-dione); 3,5-Hdnb = 3,5-dinitrobenzoic acid; py = pyridine; Pydm = 2,6-pyridinedimethanol; dnbz = dinitrobenzoato; pydca = pyridine-2,6-dicarboxylato; dmpy = 2,6-dimethanolpyridine; naphH<sub>2</sub> = 1-naphthalene phosphonic acid; 4,4'-bpy = 4,4'-bipyridine; neo = neocuproine; ac = acetate; piv = pivalate; 4OH-benz = 4-hydroxybenzoate; H<sub>2</sub>DPA = 2,6-pyridine-dicarboxylic acid; Hhfa = 1,1,1,5,5,5-hexafluoro-2,4-pentanedione; pic = 4-methylpyridine; L4H<sub>2</sub> = Fe[(C<sub>5</sub>H<sub>4</sub>){-C(Me)=N-N=CH-C<sub>6</sub>H<sub>3</sub>-2-OH-3-OCH<sub>3</sub>}]<sub>2</sub>; L5 = N3,N6-bis(pyridin-2-ylmethyl)-1,2,4,5-tetrazine-3,6-diamine; Hhfac = hexafluoroacetylacetone; Pydm = 2,6-pyridinedimethanol; dnbz = dinitrobenzoato; Spy = 4-styrylpyridine; MbIm = 5,6-dimethylbenzimidazole; L6 = (E)-2-(((4H-1,2,4-triazol-4-yl)imino)methyl)-6-methoxyphenol; L7 = N'-(2-hydroxybenzylidene)acetohydrazide; 2,6-Hdfba = 2,6-difluorobenzoic acid, bpp = 1,3-bis(4-pyridyl)propane, bpe = 1,2-bis(4-pyridyl)ethylene; HL8 = quinoline-2-carboxylic acid

| compound                                                                                                | Donor set              | coordinated geometry | $\tau$ | $D/\text{cm}^{-1}$ | $E/D$ | $H_{dc}/\text{Oe}$ | $U_{\text{eff}}/\text{cm}^{-1}$ | Ref         |
|---------------------------------------------------------------------------------------------------------|------------------------|----------------------|--------|--------------------|-------|--------------------|---------------------------------|-------------|
| $[\text{Co}^{\text{II}}(\text{H}_2\text{dapb})(\text{H}_2\text{O})(\text{NO}_3)](\text{NO}_3)$          | $\text{N}_3\text{O}_4$ | pentagonal bipyramid | 0.417  | 32.4               | 0     | 1000               | 56.3                            | S20         |
| $[\text{Co}(\text{DAPBH})(\text{NO}_3)(\text{H}_2\text{O})](\text{NO}_3)$                               | $\text{N}_3\text{O}_4$ | pentagonal bipyramid | 0.417  | 31.0               | 0     | 1000               | 34.75                           | S21/<br>S22 |
| $[\text{Co}(\text{L9})_3(\text{NO}_3)_2]$                                                               | $\text{N}_3\text{O}_4$ | pentagonal bipyramid | 1.410  | 35.8               | 0     | 1000               | 17.7                            | S23         |
| $[\text{Co}(\text{L10})_3(\text{NO}_3)_2]$                                                              | $\text{N}_3\text{O}_4$ | pentagonal bipyramid | 1.542  | 35.7               | 0     | 1200               | 11.0                            | S23         |
| $[\text{Co}^{\text{II}}(\text{pypzbeyz})(\text{NO}_3)_2]$                                               | $\text{N}_3\text{O}_4$ | pentagonal bipyramid | 3.010  | 29.9               | 0.01  | 1000               | 34.6                            | S24         |
| $[\text{Co}(\text{bpy})(\text{NO}_3)_2(\text{CH}_3\text{CN})]$                                          | $\text{N}_3\text{O}_4$ | pentagonal bipyramid | 1.89   | 32.9               | 0     | 1000               | 39.4                            | S25         |
| $[\text{Co}(\text{phen})(\text{NO}_3)_2(\text{CH}_3\text{CN})]$                                         | $\text{N}_3\text{O}_4$ | pentagonal bipyramid | 1.93   | 31.4               | 0     | 1000               | 32.0                            | S25         |
| $[\text{Co}(\text{H}_2\text{daps})(\text{MeOH})_2]$                                                     | $\text{N}_3\text{O}_4$ | pentagonal bipyramid | 0.235  | 43.1               | 0.07  | 1000               | 23.28                           | S26         |
| $[\text{Co}^{\text{II}}\text{L11}] \cdot \text{H}_2\text{O}$                                            | $\text{N}_3\text{O}_4$ | pentagonal bipyramid | 3.076  | 29.1               | 0     | 1000               | /                               | S27         |
| $[\text{Co}(\text{H}_2\text{dapsc})(\text{H}_2\text{O})_2](\text{NO}_3)_2 \cdot 2\text{H}_2\text{O}$    | $\text{N}_3\text{O}_4$ | pentagonal bipyramid | 0.191  | 38.02              | 0.018 | 1200               | /                               | S28         |
| $[\text{Co}(\text{H}_4\text{L12})(\text{DMF})(\text{H}_2\text{O})](\text{NO}_3)_2 \cdot (\text{DMF})$   | $\text{N}_3\text{O}_4$ | pentagonal bipyramid | 0.293  | 35.92              | 0.04  | 3500               | 17.37                           | S29         |
| $[\text{Co}(\text{H}_4\text{L12})(\text{MeOH})(\text{H}_2\text{O})](\text{NO}_3)_2 \cdot (\text{MeOH})$ | $\text{N}_3\text{O}_4$ | pentagonal bipyramid | 0.067  | 37.23              | 0.02  | 3500               | 10.42                           | S29         |
| $[\text{Co}(\text{H}_4\text{L12})(\text{DEF})(\text{H}_2\text{O})](\text{NO}_3)_2$                      | $\text{N}_3\text{O}_4$ | pentagonal bipyramid | 0.253  | 43.76              | 0.01  | 3500               | 2.78                            | S29         |
| $[\text{Co}(\text{L13})_2(\text{CH}_3\text{OH})_2]$                                                     | $\text{N}_3\text{O}_4$ | pentagonal bipyramid | 0.614  | 46.74              | 0.01  | 3000               | 9.20                            | S30         |

$\text{H}_2\text{dapb}$  = 2,6-diacetylpyridine bis(benzoylhydrazine);  $\text{DAPBH}$  = 2,6-diacetylpyridinebis(2'-pyridylhydrazone);  $\text{L9}$  = 4-tert-butylpyridine;  $\text{L10}$  = isoquinoline;  $\text{Pypzbeyz}$  = N-((6-(1H-pyrazol-1-yl)pyridin-2-yl)methylene)benzohydrazide;  $\text{bpy}$  = 2,2'-bipyridine;  $\text{phen}$  = 1,10-phenanthroline;  $\text{H}_4\text{daps}$  = 2,6-bis(1-salicyloylhydrazonoethyl);  $\text{H}_2\text{L11}$  = 3,12,18-triaza-6,9-dioxabicyclo[12.3.1]octadeca-1,14,16-triene-3,12-diacetic acid;  $\text{H}_2\text{dapsc}$  = 2,6-diacetylpyridine bis(semicarbazone);  $\text{H}_4\text{L12}$  = 2,2'-(pyridine-2,6-diylbis(ethan-1-yl-1-ylidene))bis(N-phenylhydrazinecarboxamide);  $\text{HL13}$  = 2,6-bis(pyrazole-1-yl)pyridine-4-carboxylic acid

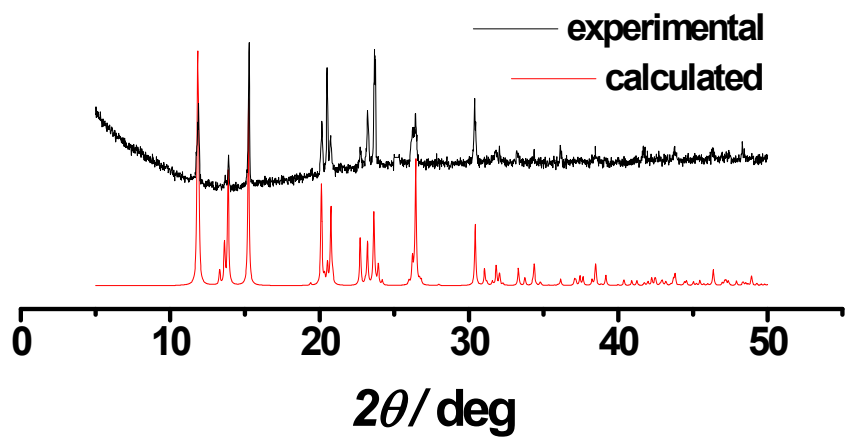

Fig. S1 XRD patterns for complex 1.

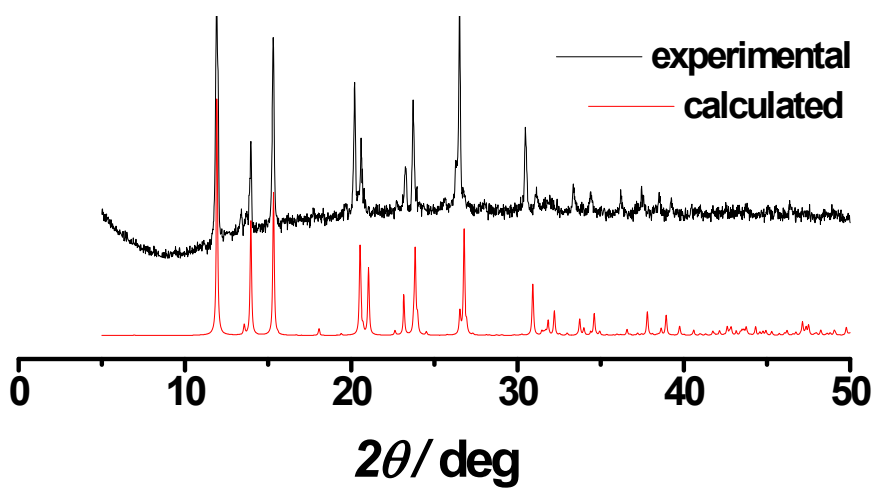

Fig. S2 XRD patterns for complex 2.

**Table S2.** Summary of crystal data and refinement for **1-2**.

|                                                                                          | <b>1</b>                                                        | <b>2</b>                                                        |
|------------------------------------------------------------------------------------------|-----------------------------------------------------------------|-----------------------------------------------------------------|
| Molecular formula                                                                        | C <sub>16</sub> H <sub>12</sub> CoN <sub>6</sub> O <sub>6</sub> | C <sub>16</sub> H <sub>12</sub> CoN <sub>6</sub> O <sub>6</sub> |
| CCDC no                                                                                  | 2226213                                                         | 2226214                                                         |
| Formula weight                                                                           | 443.25                                                          | 443.25                                                          |
| Temperature                                                                              | 296(2) K                                                        | 296(2) K                                                        |
| Crystal system                                                                           | Monoclinic                                                      | Monoclinic                                                      |
| Space group                                                                              | <i>C2/c</i>                                                     | <i>P2<sub>1</sub>/c</i>                                         |
| <i>a</i> / Å                                                                             | 14.7033(7)                                                      | 14.509(3)                                                       |
| <i>b</i> / Å                                                                             | 9.1448 (4)                                                      | 9.1423(18)                                                      |
| <i>c</i> / Å                                                                             | 15.3254(8)                                                      | 14.924(3)                                                       |
| $\alpha$ (°)                                                                             | 90                                                              | 90                                                              |
| $\beta$ (°)                                                                              | 119.853(2)                                                      | 119.08                                                          |
| $\gamma$ (°)                                                                             | 90                                                              | 90                                                              |
| <i>V</i> / Å <sup>3</sup>                                                                | 1787.20(15)                                                     | 1729.9(6)                                                       |
| <i>Z</i>                                                                                 | 4                                                               | 4                                                               |
| <i>D</i> <sub>calc</sub> , g/cm <sup>3</sup>                                             | 1.647                                                           | 1.702                                                           |
| $\mu$ / mm <sup>-1</sup>                                                                 | 1.010                                                           | 1.044                                                           |
| <i>F</i> (000)                                                                           | 900                                                             | 900                                                             |
| $\theta$ range [°]                                                                       | 2.741/27.672                                                    | 1.606/25.265                                                    |
| Reflns collected                                                                         | 13966                                                           | 12477                                                           |
| <i>R</i> <sub>int</sub>                                                                  | 0.0254                                                          | 0.0374                                                          |
| Indep. reflns                                                                            | 2086                                                            | 3078                                                            |
| Data/restr./paras                                                                        | 2086/0/132                                                      | 3078/3/262                                                      |
| Goodness-of-fit on <i>F</i> <sup>2</sup>                                                 | 1.190                                                           | 1.049                                                           |
| <i>R</i> <sub>1</sub> , <i>wR</i> <sub>2</sub> [ <i>I</i> > 2σ( <i>I</i> )] <sup>a</sup> | 0.0480/0.1348                                                   | 0.0249/0.0650                                                   |
| <i>R</i> <sub>1</sub> , <i>wR</i> <sub>2</sub> [all data] <sup>a</sup>                   | 0.0615/0.1632                                                   | 0.0307/0.0679                                                   |

$$^a wR_2 = [\Sigma[w(F_o^2 - F_c^2)^2] / \Sigma[w(F_o^2)^2]]^{1/2}, R_1 = \Sigma||F_o| - |F_c|| / \Sigma|F_o|.$$

**Table S3.** Selected bond lengths (Å) and angles (deg) for **1** and **2**.

| <b>1</b>      |          | <b>2</b>    |           |
|---------------|----------|-------------|-----------|
| Co1-O1        | 2.205(2) | Co1-O1      | 2.197(13) |
| Co1-O1'       | 2.205(2) | Co1-O2      | 2.151(12) |
| Co1-O2        | 2.210(2) | Co1-O4      | 2.211(13) |
| Co1-O2'       | 2.210(2) | Co1-O5      | 2.229(13) |
| Co1-N1        | 2.120(2) | Co1-N1      | 2.189(15) |
| Co1-N1'       | 2.120(2) | Co1-N2      | 2.300(15) |
| Co1...N2      | 2.706(0) | Co1-N3      | 2.114(14) |
| Co1...N2'     | 2.706(0) | Co1...N4    | 3.061(0)  |
| O1-Co1-O2     | 57.74(8) | O1-Co1-O2   | 59.50(4)  |
| O1'-Co1-O2'   | 57.74(8) | O4-Co1-O5   | 57.97(4)  |
| N1-Co1...N2   | 54.48(0) | N1-Co1-N2   | 60.07(5)  |
| N1'-Co1...N2' | 54.38(0) | N3-Co1...N4 | 48.77(0)  |

**Table S4.** The results of the continuous shape measure (CSM) analyses of [Co(napy)<sub>2</sub>(NO<sub>3</sub>)<sub>2</sub>] in **1** and **2** by SHAPE software.<sup>S31</sup>

| CSM        |                            | <b>1</b> | CSM                                  |                              | <b>1</b> |
|------------|----------------------------|----------|--------------------------------------|------------------------------|----------|
| Six-vertex | Hexagon                    | 20.566   | Seven-vertex                         | Heptagon                     | 27.690   |
|            | Pentagonal pyramid         | 18.603   |                                      | Hexagonal pyramid            | 20.583   |
|            | Octahedron                 | 8.496    |                                      | Pentagonal bipyramid         | 5.010    |
|            | Trigonal prism             | 7.428    |                                      | Capped octahedron            | 5.905    |
|            | Johnson pentagonal pyramid | 20.397   |                                      | Capped trigonal prism        | 4.481    |
|            |                            |          |                                      | Johnson pentagonal bipyramid | 7.981    |
|            |                            |          | Johnson elongated triangular pyramid | 21.071                       |          |

|          |              |                         |                         |                                        |                            |                      |
|----------|--------------|-------------------------|-------------------------|----------------------------------------|----------------------------|----------------------|
| <b>1</b> | CSM          | Octagon                 | Heptagonal pyramid      | Hexagonal bipyramid                    | Cube                       | Square antiprism     |
|          | Eight-vertex | 34.762                  | 22.158                  | 15.520                                 | 10.541                     | 5.473                |
|          | CSM          | Triangular dodecahedron | Johnson gyrobifastigium | Johnson elongated triangular bipyramid | Biaugmented trigonal prism | Biaugmented trigonal |
|          | Eight-vertex | 4.880                   | 11.101                  | 21.988                                 | 5.080                      | 5.547                |
|          | CSM          | Snub diphendoid         | Triakis tetrahedron     | Elongated trigonal bipyramid           |                            |                      |
|          | Eight-vertex | 4.451                   | 11.360                  | 21.540                                 |                            |                      |



| CSM        |                            | 2      | CSM                                  |                              | 2      |
|------------|----------------------------|--------|--------------------------------------|------------------------------|--------|
| Six-vertex | Hexagon                    | 20.367 | Seven-vertex                         | Heptagon                     | 27.434 |
|            | Pentagonal pyramid         | 18.062 |                                      | Hexagonal pyramid            | 19.905 |
|            | Octahedron                 | 8.829  |                                      | Pentagonal bipyramid         | 3.955  |
|            | Trigonal prism             | 7.718  |                                      | Capped octahedron            | 5.047  |
|            | Johnson pentagonal pyramid | 19.667 |                                      | Capped trigonal prism        | 3.787  |
|            |                            |        |                                      | Johnson pentagonal bipyramid | 7.060  |
|            |                            |        | Johnson elongated triangular pyramid | 20.395                       |        |

|   |              |                         |                         |                                        |                            |                      |
|---|--------------|-------------------------|-------------------------|----------------------------------------|----------------------------|----------------------|
| 2 | CSM          | Octagon                 | Heptagonal pyramid      | Hexagonal bipyramid                    | Cube                       | Square antiprism     |
|   | Eight-vertex | 34.557                  | 22.170                  | 15.519                                 | 10.891                     | 5.364                |
|   | CSM          | Triangular dodecahedron | Johnson gyrobifastigium | Johnson elongated triangular bipyramid | Biaugmented trigonal prism | Biaugmented trigonal |
|   | Eight-vertex | 4.947                   | 11.170                  | 23.082                                 | 4.347                      | 5.477                |
|   | CSM          | Snub diphenoid          | Triakis tetrahedron     | Elongated trigonal bipyramid           |                            |                      |
|   | Eight-vertex | 4.717                   | 10.947                  | 22.486                                 |                            |                      |

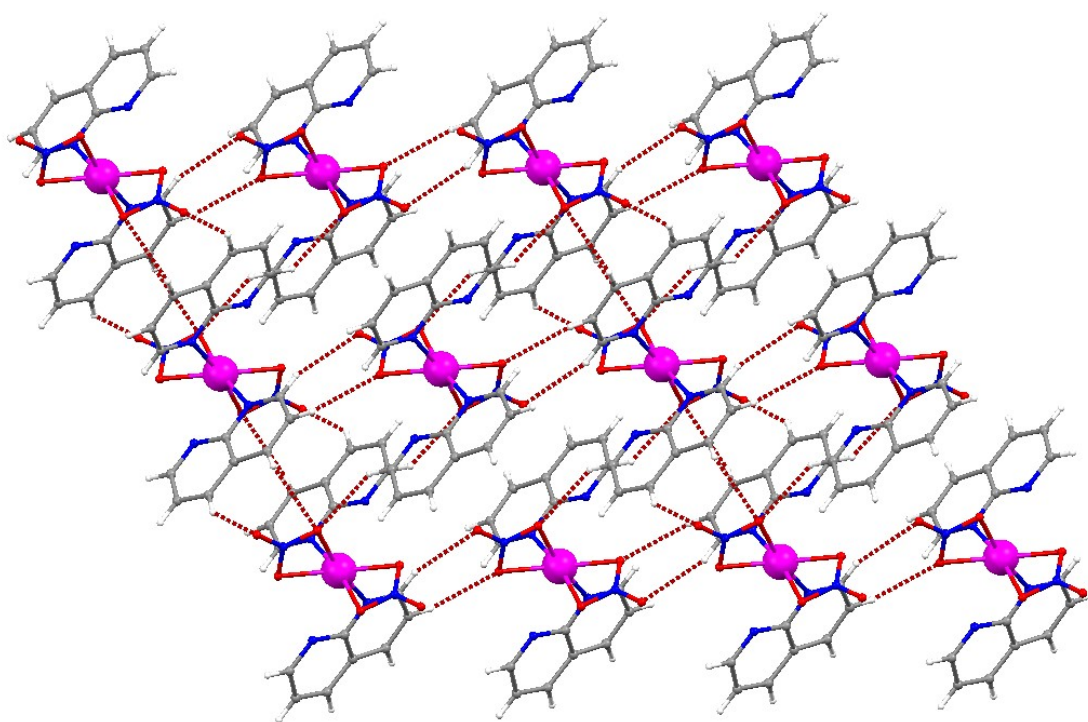

**Fig. S3** The weak interactions in **1**.

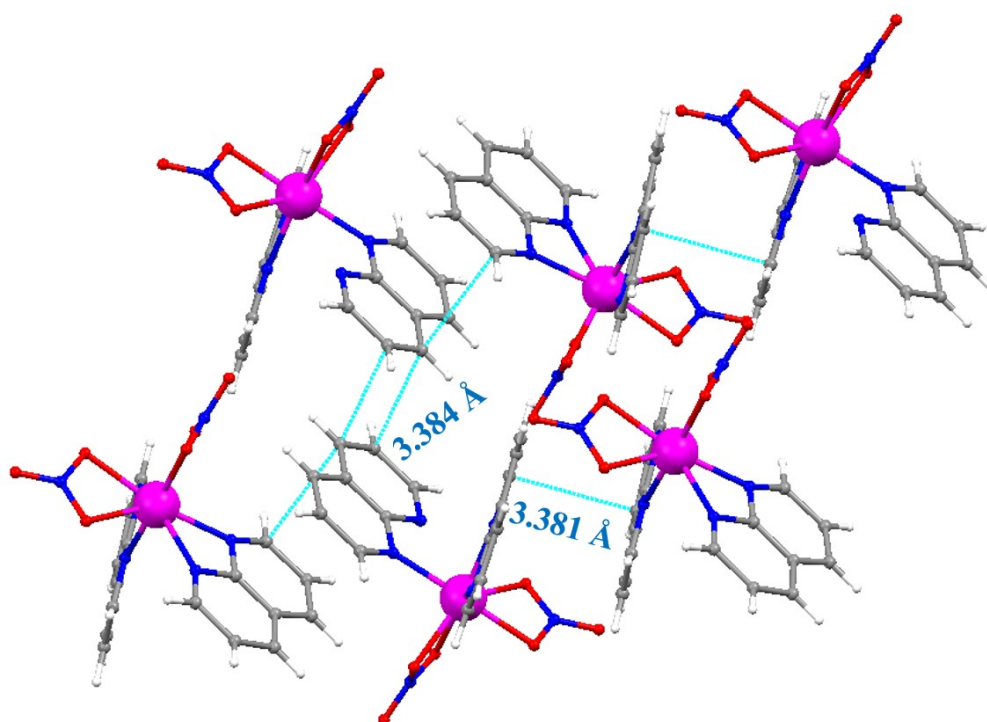

**Fig. S4** The  $\pi \cdots \pi$  stacking interactions in **2**.

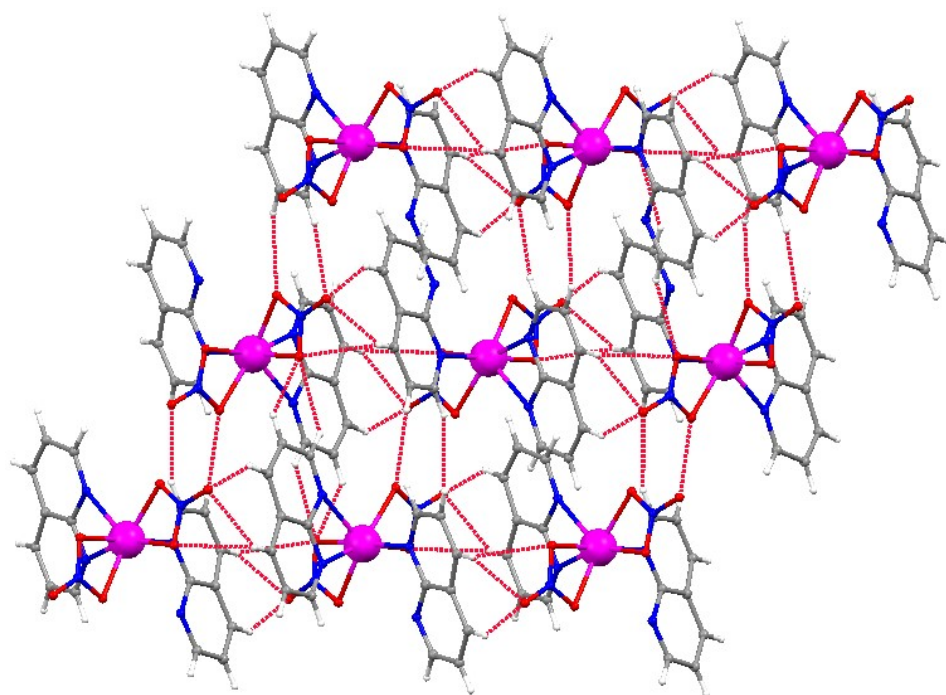

Fig. S5 Weak hydrogen bonding in **2**.

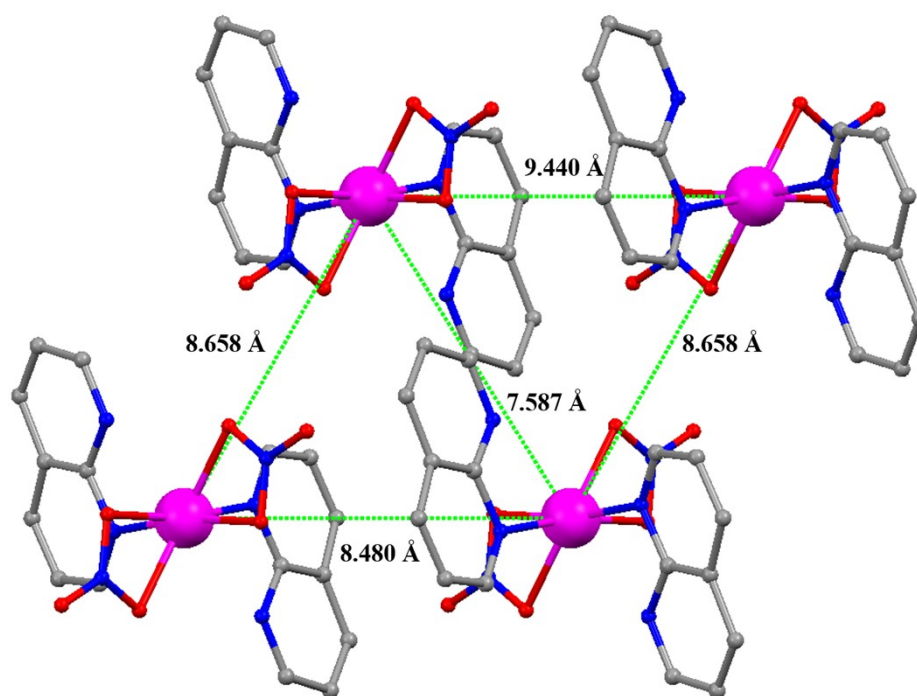

Fig. S6 The intermolecular Co-Co distances in **1**.

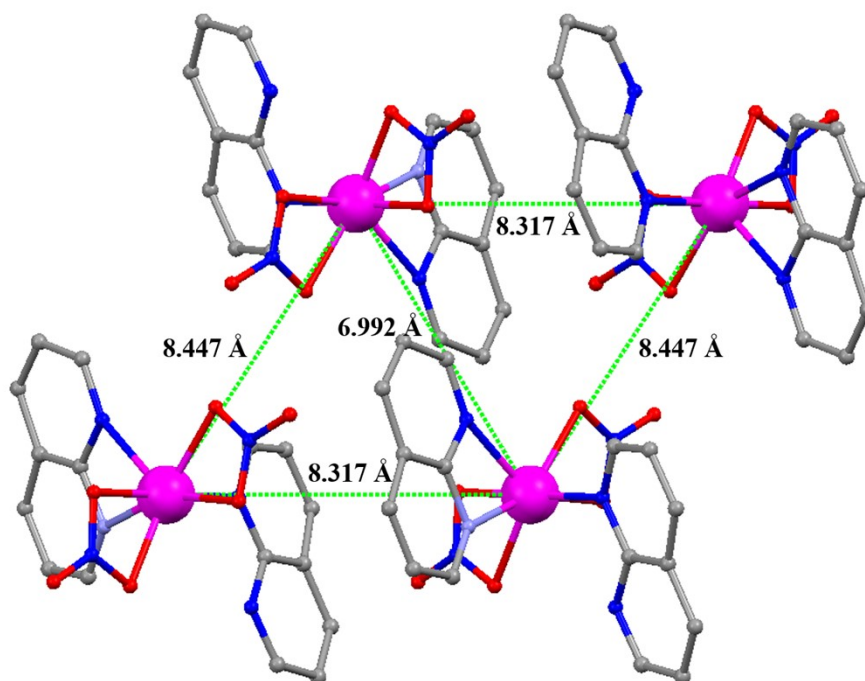

**Fig. S7** The intermolecular Co-Co distances in **2**.

**Table S5.** Zero field splitting parameters obtained fitting the experimental data using the PHI program for **1** and **2**.

|                                                   | <b>1</b>                    | <b>2</b>                    |
|---------------------------------------------------|-----------------------------|-----------------------------|
| $D, \text{cm}^{-1}$                               | $-36.94(7)$                 | $+12.87(6)$                 |
| $E, \text{cm}^{-1}$                               | $+6.87(0)$                  | $+0.02(0)$                  |
| $g_x, g_y, g_z$                                   | $2.01(6), 2.01(6), 2.41(0)$ | $2.11(6), 2.11(6), 2.42(1)$ |
| $\chi_{TIP}, \text{cm}^3 \cdot \text{K mol}^{-1}$ | $0.87(6) \times 10^{-3}$    | $0.91(0) \times 10^{-3}$    |
| $zj, \text{cm}^{-1}$                              | $-0.05(0)$                  | $-0.01(8)$                  |

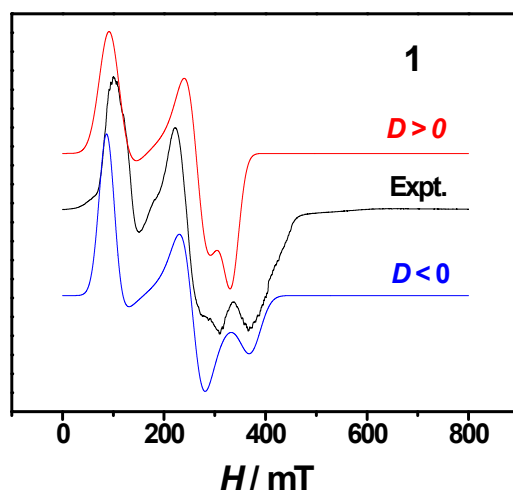

**Fig. S8** Experimental X-band EPR spectrum (black) and the simulations of **1** at 2 K (red trace: positive  $D$  and blue trace: negative  $D$ ).

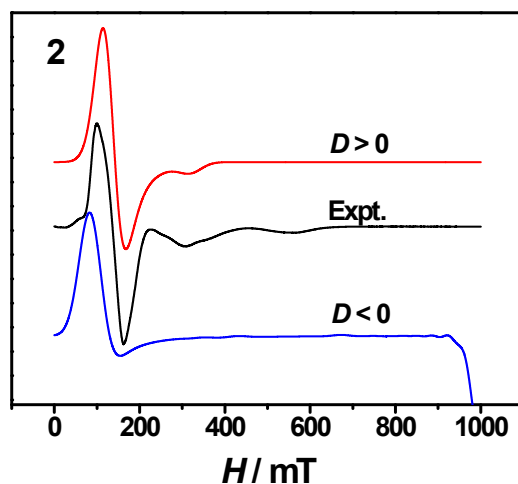

**Fig. S9** Experimental X-band EPR spectrum (black) and the simulations of **2** at 2 K (red trace: positive  $D$  and blue trace: negative  $D$ ).

### Theoretical calculations

All theoretical calculations were pursued with the ORCA 5.0.3 package.<sup>S32-S34</sup> The state average complete active space self-consistent field (SA-CASSCF) was used to calculate the zero-field splitting and g-factors for Co(II)-SIMs. The CASSCF wave functions were complemented by the N-electron valence second order perturbation theory (NEVPT2) with CAS(7,5) active spaces.<sup>S35,S36</sup> In the state averaged approach all multiplets for the given electron configuration were equally weighted, which means 10 quartet and 40 doublet states. The ZFS parameters were calculated through

the quasi-degenerate perturbation theory (QDPT),<sup>S37</sup> in which approximations to the Breit-Pauli form of the spin-orbit coupling operator (RI-SOMF approximation)<sup>S38</sup> and the effective Hamiltonian theory were utilized.<sup>S39</sup> The def2-TZVP(-f) basis set S6 was used for all calculations, assisted by the autoaux basis set in the RI calculations,<sup>S36</sup> and the chain-of-spheres (RIJCOSX) approximation to exact exchange.<sup>S40</sup> Additionally, Local spin-Hamiltonian parameters g-factors have been computed by using the SINGLE\_ANISO module from the EHA method.<sup>S41</sup>

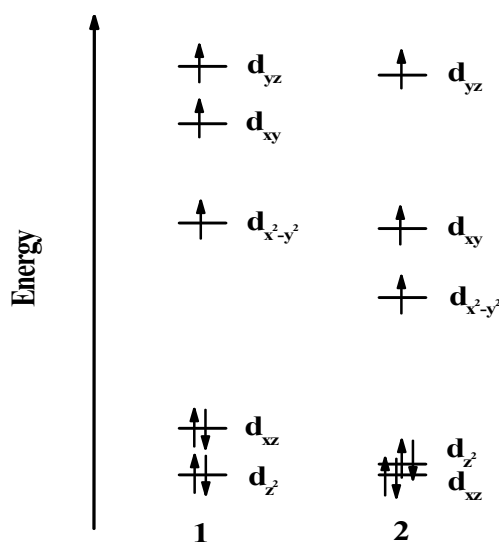

**Fig. S10** Orbital energy diagrams for **1** (left) and **2** (right).

**Table S6.** ORCA/CASSCF+NEVPT2 computed **D**, **E**, and g value for complex **2**.

| Complex | <i>D</i> (cm <sup>-1</sup> ) | <i>E</i> (cm <sup>-1</sup> ) | <i>g</i> <sub>iso</sub> | <i>g</i> <sub>x</sub> | <i>g</i> <sub>y</sub> | <i>g</i> <sub>z</sub> |
|---------|------------------------------|------------------------------|-------------------------|-----------------------|-----------------------|-----------------------|
| 2       | 18.0026                      | 5.3328                       | 2.3149                  | 2.1827                | 2.3096                | 2.4524                |

**Table S7.** The CASSCF/NEVPT2/def2-TZVP(-f)//def2-SVP computed Individual contributions to *D*-tensor for complex **2**.

| 2S+1 | Root | <i>D</i> | <i>E</i> |
|------|------|----------|----------|
| 4    | 0    | 0.000    | 0.000    |
| 4    | 1    | 20.206   | 16.431   |
| 4    | 2    | 10.269   | -8.232   |
| 4    | 3    | -19.428  | 0.000    |
| 4    | 4    | 5.962    | -2.463   |
| 4    | 5    | -0.018   | -0.000   |
| 4    | 6    | 0.056    | -0.022   |
| 4    | 7    | 0.038    | -0.036   |
| 4    | 8    | -0.000   | 0.000    |
| 4    | 9    | 0.035    | 0.035    |

|   |    |        |        |
|---|----|--------|--------|
| 2 | 0  | 1.524  | 0.000  |
| 2 | 1  | -1.931 | -0.446 |
| 2 | 2  | 0.001  | -0.000 |
| 2 | 3  | 0.002  | -0.000 |
| 2 | 4  | -0.346 | -0.205 |
| 2 | 5  | -1.726 | -0.890 |
| 2 | 6  | 0.093  | -0.000 |
| 2 | 7  | -1.259 | 0.758  |
| 2 | 8  | 4.127  | -0.000 |
| 2 | 9  | 0.015  | 0.000  |
| 2 | 10 | -0.299 | 0.221  |
| 2 | 11 | -0.263 | -0.240 |
| 2 | 12 | -0.311 | -0.260 |
| 2 | 13 | -0.456 | 0.360  |
| 2 | 14 | 0.202  | -0.000 |
| 2 | 15 | -0.211 | 0.031  |
| 2 | 16 | 0.002  | 0.000  |
| 2 | 17 | 0.000  | 0.000  |
| 2 | 18 | 0.053  | -0.000 |
| 2 | 19 | -0.412 | -0.152 |
| 2 | 20 | 1.591  | 0.000  |
| 2 | 21 | 0.016  | 0.000  |
| 2 | 22 | -0.286 | 0.230  |
| 2 | 23 | -0.234 | 0.233  |
| 2 | 24 | -0.285 | -0.278 |
| 2 | 25 | -0.075 | 0.072  |
| 2 | 26 | 0.000  | 0.000  |
| 2 | 27 | 0.026  | -0.000 |
| 2 | 28 | 0.091  | -0.000 |
| 2 | 29 | -0.154 | -0.037 |
| 2 | 30 | 0.152  | 0.000  |
| 2 | 31 | -0.079 | 0.009  |
| 2 | 32 | 0.010  | -0.000 |
| 2 | 33 | -0.019 | 0.019  |
| 2 | 34 | -0.002 | -0.000 |
| 2 | 35 | 0.001  | 0.000  |
| 2 | 36 | -0.035 | 0.009  |
| 2 | 37 | 0.015  | 0.000  |
| 2 | 38 | 0.029  | -0.000 |
| 2 | 39 | -0.020 | -0.019 |

---

**Table S8** The optimized structure and energy of complexes **1** and **2** at the TPSS/def2-TZVP(-f) level of theory.

**Complex 1**

**E= -75654.50762 eV**

| Atoms | X        | Y        | Z         |
|-------|----------|----------|-----------|
| Co    | 5.444504 | 2.794633 | 3.322961  |
| O     | 6.560599 | 1.212722 | 2.196006  |
| O     | 7.132067 | 1.954716 | 4.156401  |
| O     | 8.322748 | 0.343817 | 3.212187  |
| N     | 4.535419 | 4.130928 | 4.662126  |
| N     | 6.632405 | 4.791968 | 5.347520  |
| N     | 7.379831 | 1.119279 | 3.175613  |
| C     | 3.212143 | 4.184435 | 4.772712  |
| H     | 2.654712 | 3.603015 | 4.044315  |
| C     | 2.543876 | 4.938713 | 5.759064  |
| H     | 1.459350 | 4.929492 | 5.787399  |
| C     | 3.281705 | 5.653831 | 6.673612  |
| H     | 2.801467 | 6.232222 | 7.459162  |
| C     | 4.693929 | 5.628883 | 6.583804  |
| C     | 5.293139 | 4.859650 | 5.540396  |
| C     | 7.404646 | 5.450141 | 6.195593  |
| H     | 8.477077 | 5.373592 | 6.023403  |
| C     | 6.919953 | 6.221905 | 7.278593  |
| H     | 7.619200 | 6.728051 | 7.936669  |
| C     | 5.561057 | 6.317635 | 7.466498  |
| H     | 5.141608 | 6.906284 | 8.278719  |
| O     | 4.328352 | 1.212810 | 4.450023  |
| O     | 3.756910 | 1.954733 | 2.489593  |
| O     | 2.566141 | 0.343964 | 3.433908  |
| N     | 6.353561 | 4.130864 | 1.983719  |
| N     | 4.256587 | 4.791919 | 1.298285  |
| N     | 3.509108 | 1.119362 | 3.470428  |
| C     | 7.676820 | 4.184391 | 1.873192  |
| H     | 8.234227 | 3.602991 | 2.601633  |
| C     | 8.345114 | 4.938652 | 0.886839  |
| H     | 9.429670 | 4.929404 | 0.858498  |
| C     | 7.607297 | 5.653764 | -0.027722 |
| H     | 8.087558 | 6.232146 | -0.813278 |
| C     | 6.195093 | 5.628808 | 0.062034  |
| C     | 5.595869 | 4.859569 | 1.105413  |
| C     | 3.484367 | 5.450131 | 0.450224  |
| H     | 2.411908 | 5.373636 | 0.622433  |
| C     | 3.969075 | 6.221912 | -0.632749 |



|   |          |          |           |
|---|----------|----------|-----------|
| H | 3.269821 | 6.728130 | -1.290781 |
| C | 5.327972 | 6.317609 | -0.820641 |
| H | 5.747415 | 6.906293 | -1.632803 |

**Complex 2**

**E= -75655.73130 eV**

| Atoms | X        | Y         | Z         |
|-------|----------|-----------|-----------|
| Co    | 5.385136 | 8.627277  | 9.819997  |
| N     | 4.479266 | 7.290445  | 11.158345 |
| N     | 6.577836 | 6.579563  | 11.786976 |
| N     | 6.265664 | 7.302601  | 8.452747  |
| N     | 4.154016 | 6.648416  | 7.806377  |
| N     | 3.469075 | 10.318604 | 9.989957  |
| N     | 7.333983 | 10.283988 | 9.682862  |
| O     | 3.706981 | 9.496913  | 9.001852  |
| O     | 4.286818 | 10.206458 | 10.965108 |
| O     | 2.533275 | 11.101131 | 9.965679  |
| O     | 7.08027  | 9.447398  | 10.654372 |
| O     | 6.513717 | 10.208083 | 8.706359  |
| O     | 8.285381 | 11.046917 | 9.722022  |
| C     | 3.158558 | 7.261964  | 11.298951 |
| H     | 2.595218 | 7.859729  | 10.589331 |
| C     | 2.49862  | 6.513349  | 12.295076 |
| H     | 1.415888 | 6.544784  | 12.349718 |
| C     | 3.243298 | 5.774861  | 13.18539  |
| H     | 2.770742 | 5.199999  | 13.977658 |
| C     | 4.653166 | 5.770559  | 13.061087 |
| C     | 5.242906 | 6.538229  | 12.010862 |
| C     | 7.357404 | 5.895751  | 12.606612 |
| H     | 8.426118 | 5.952392  | 12.407805 |
| C     | 6.882966 | 5.121156  | 13.69224  |
| H     | 7.586951 | 4.592227  | 14.32651  |
| C     | 5.527522 | 5.053743  | 13.914114 |
| H     | 5.116136 | 4.465265  | 14.730153 |
| C     | 7.585664 | 7.252234  | 8.311411  |
| H     | 8.160054 | 7.820331  | 9.036397  |
| C     | 8.231426 | 6.51772   | 7.295667  |
| H     | 9.314589 | 6.529646  | 7.241832  |
| C     | 7.472924 | 5.818219  | 6.385809  |
| H     | 7.934553 | 5.255989  | 5.57818   |
| C     | 6.063206 | 5.837859  | 6.510112  |
| C     | 5.48795  | 6.588038  | 7.580817  |
| C     | 3.361741 | 6.002313  | 6.968554  |
| H     | 2.294277 | 6.07354   | 7.169373  |

|   |          |          |          |
|---|----------|----------|----------|
| C | 3.821512 | 5.249271 | 5.861685 |
| H | 3.107652 | 4.751962 | 5.21305  |
| C | 5.175475 | 5.161932 | 5.637745 |
| H | 5.575663 | 4.588446 | 4.805608 |

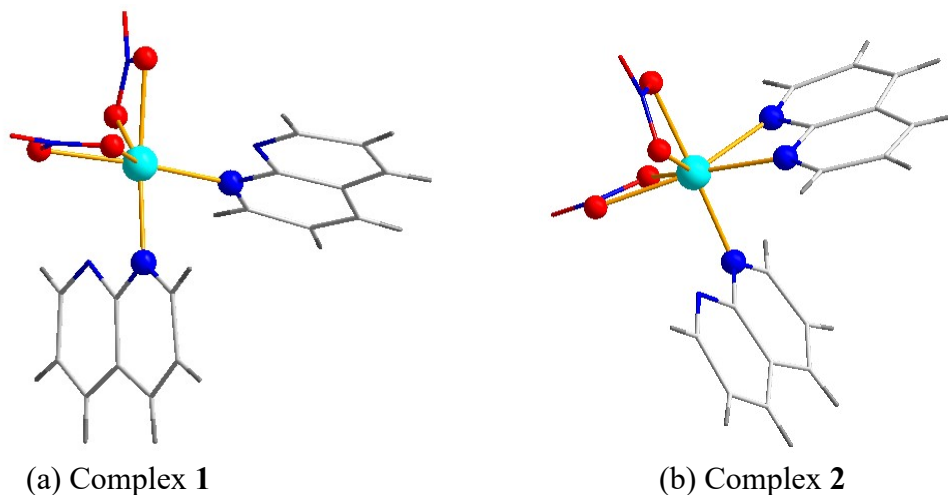

Fig. S11 Calculated complete structure of complexes.

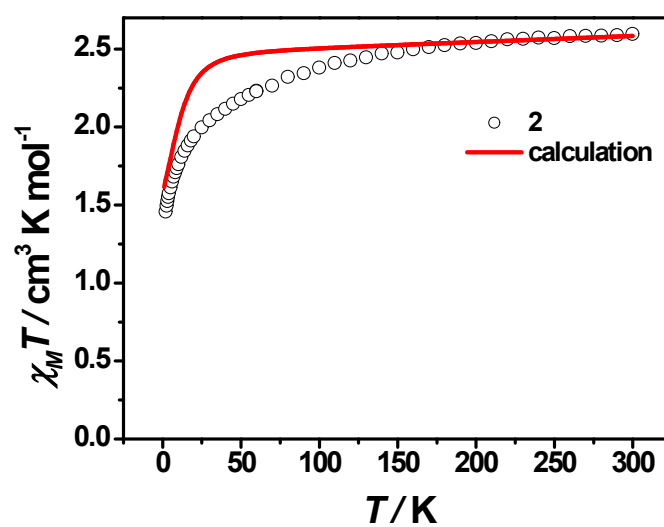

Fig. S12 Calculated (red solid line) data of magnetic susceptibilities of 2.

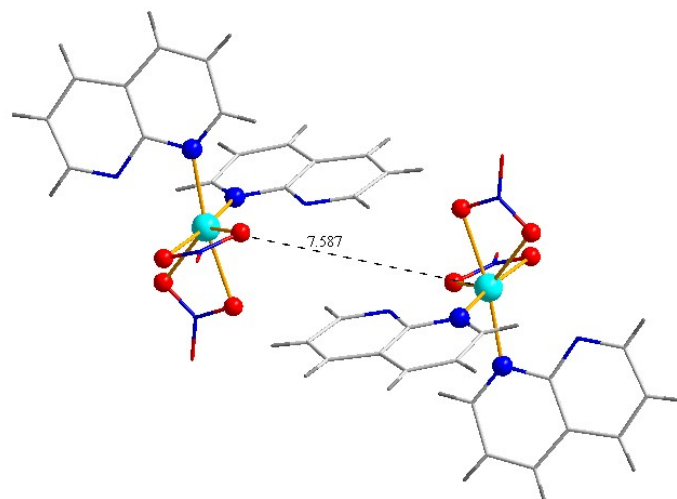

**Fig. S13** The nearest fragment diagram for complex **1**.

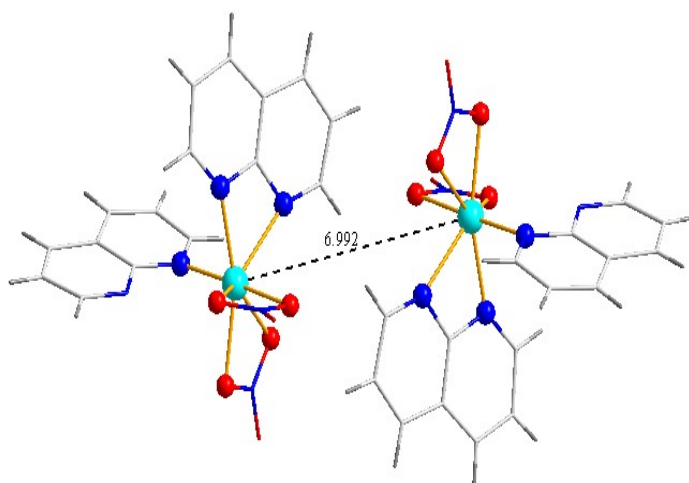

**Fig. S14** The nearest fragment diagram for complex **2**.

The magnetic coupling constants were obtained by calculating the energy gap between the high spin state ( $E_{\text{HS}}$ ,  $|+3/2,+3/2\rangle$ ) and the broken symmetry state ( $E_{\text{BS}}$ ,  $|+3/2,-3/2\rangle$ ) at the B3LYP-D4/def2-TZVP(-f) level of theory,<sup>S42,S43</sup> that the density functional theory and the broken-symmetry state method (DFT-BS) was proposed by Noodleman. The magnetic coupling constant between two nearest neighbor Co-SIMs segments is can be obtained using the HDVV Hamiltonian description:

$$\hat{H} = -2J\hat{S}_1 \cdot \hat{S}_2 \quad (2)$$

Where  $J$  is the magnetic coupling constant between Co(II) ions, and  $\hat{S}_1$  and  $\hat{S}_2$  are the respective spin operators representing Co(1) and Co(2) at this center.<sup>S44</sup>

The magnetic coupling constant between two nearest neighbor Co-SIMs segments

was evaluated using the formula proposed by Yamaguchi *et al.*<sup>S45</sup>

$$J = -\frac{E_{HS} - E_{BS}}{S_{HS}^2 - S_{BS}^2} \quad (3)$$

where  $S_{HS}^2$  and  $S_{BS}^2$  represents the expectation value of the square of the spin operator for the HS state and the BS state, respectively.

**Table S9.** Calculated energies of HS and BS states ( $E_{HS}$  and  $E_{BS}$ ) and magnetic coupling constants ( $J_{\text{calc}}$ ) of complexes at the B3LYP-D4/def2-TZVP(-f) level of theory.

| Co-SIMs segments       | $E_{HS}/eV$   | $E_{BS}/eV$   | $S_{HS}^2$ | $S_{BS}^2$ | $J_{\text{calc}}/\text{cm}^{-1}$ |
|------------------------|---------------|---------------|------------|------------|----------------------------------|
| 1-the nearest distance | -151235.24904 | -151235.24904 | 12.01669   | 3.01669    | 0.00                             |
| 2-the nearest distance | -151239.20967 | -151239.20967 | 12.01882   | 3.01882    | 0.00                             |

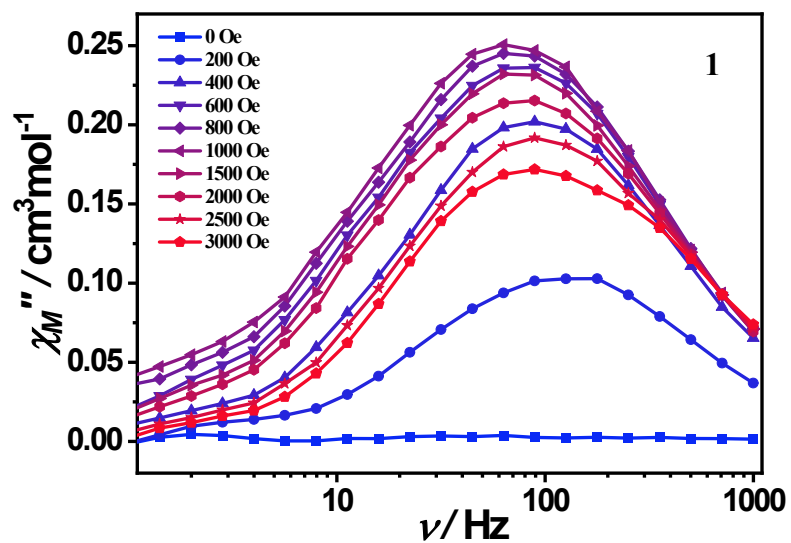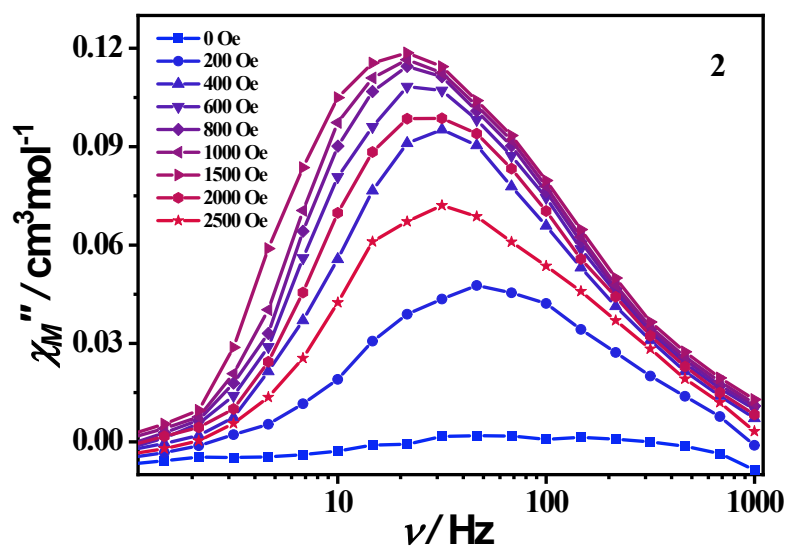

**Fig. S15** Frequency dependence of out-of-phase ( $\chi_M''$ ) ac susceptibility at 1.8 K under the different applied static fields for **1** and **2**. The solid lines are for eye guide.

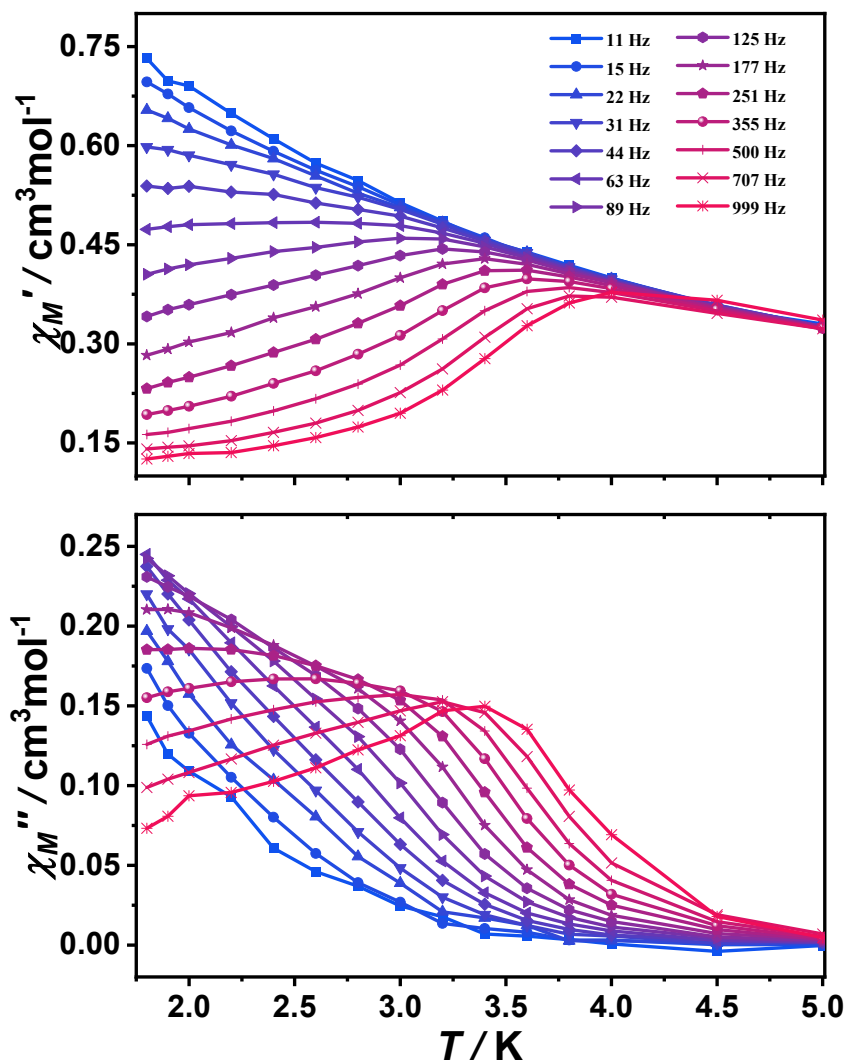

**Fig. S16** Temperature dependence of in-of-phase ( $\chi_M'$ ) and out-of-phase ac susceptibility ( $\chi_M''$ ) at different ac frequencies under 1000 dc field for **1**. The solid lines are for eye guide.

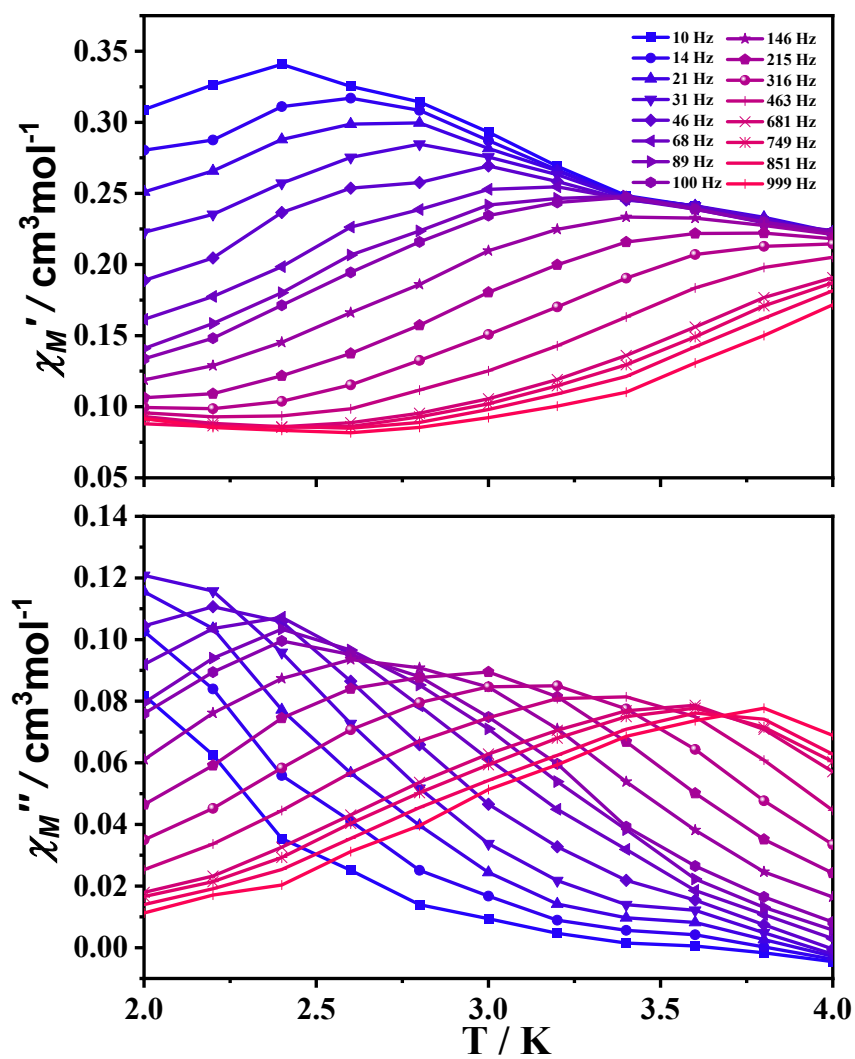

**Fig. S17** Temperature dependence of in-of-phase ( $\chi_M'$ ) and out-of-phase ac susceptibility ( $\chi_M''$ ) at different ac frequencies under 1500 Oe dc field for **2**. The solid lines are for eye guide.

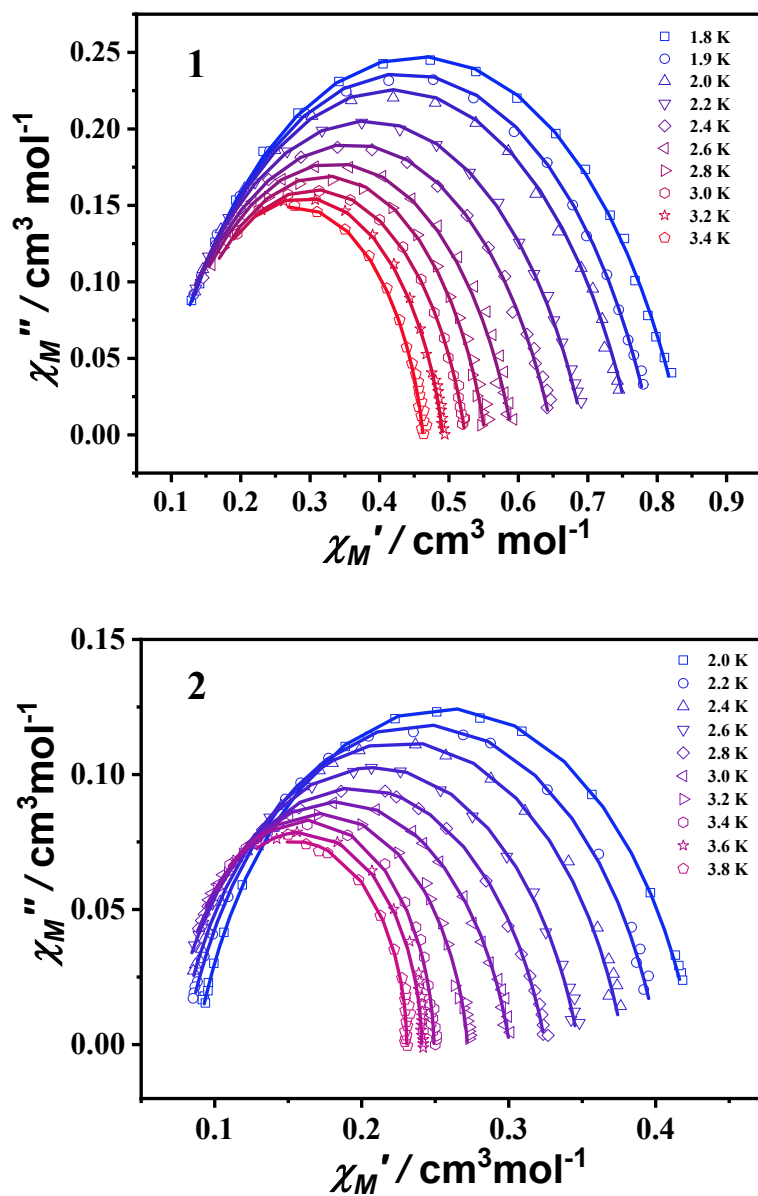

**Fig. S18** Cole-Cole plot obtained from the ac susceptibility data under a different range of temperature for **1** and **2**. Solid lines represent the best fits to a generalized Debye model.<sup>S46</sup>



**Table S10.** Relaxation times  $\tau$  (s) and  $\alpha$  values for **1**.

| <b>1</b> |          |          |                       |          |
|----------|----------|----------|-----------------------|----------|
| T (K)    | $\chi_S$ | $\chi_T$ | $\tau$ (s)            | $\alpha$ |
| 1.8      | 0.077    | 0.83     | $0.23 \times 10^{-2}$ | 0.27     |
| 1.9      | 0.078    | 0.79     | $0.20 \times 10^{-2}$ | 0.26     |
| 2.0      | 0.074    | 0.76     | $0.18 \times 10^{-2}$ | 0.26     |
| 2.2      | 0.070    | 0.70     | $0.13 \times 10^{-2}$ | 0.26     |
| 2.4      | 0.070    | 0.66     | $0.10 \times 10^{-2}$ | 0.26     |
| 2.6      | 0.071    | 0.60     | $0.78 \times 10^{-3}$ | 0.25     |
| 2.8      | 0.076    | 0.56     | $0.58 \times 10^{-3}$ | 0.23     |
| 3.0      | 0.089    | 0.52     | $0.42 \times 10^{-3}$ | 0.19     |
| 3.2      | 0.091    | 0.49     | $0.27 \times 10^{-3}$ | 0.16     |
| 3.4      | 0.085    | 0.46     | $0.17 \times 10^{-3}$ | 0.15     |

**Table S11.** Relaxation times  $\tau$  (s) and  $\alpha$  values for **2**.

| <b>2</b> |          |          |                       |          |
|----------|----------|----------|-----------------------|----------|
| T (K)    | $\chi_S$ | $\chi_T$ | $\tau$ (s)            | $\alpha$ |
| 2.0      | 0.087    | 0.43     | $6.82 \times 10^{-3}$ | 0.19     |
| 2.2      | 0.080    | 0.40     | $4.64 \times 10^{-3}$ | 0.19     |
| 2.4      | 0.075    | 0.38     | $2.93 \times 10^{-3}$ | 0.19     |
| 2.6      | 0.069    | 0.35     | $1.80 \times 10^{-3}$ | 0.19     |
| 2.8      | 0.067    | 0.32     | $1.19 \times 10^{-3}$ | 0.19     |
| 3.0      | 0.066    | 0.30     | $7.55 \times 10^{-4}$ | 0.17     |
| 3.2      | 0.071    | 0.27     | $5.04 \times 10^{-4}$ | 0.10     |
| 3.4      | 0.075    | 0.25     | $3.36 \times 10^{-4}$ | 0.031    |
| 3.6      | 0.077    | 0.24     | $2.43 \times 10^{-4}$ | 0.025    |
| 3.8      | 0.078    | 0.23     | $1.71 \times 10^{-4}$ | 0.0085   |

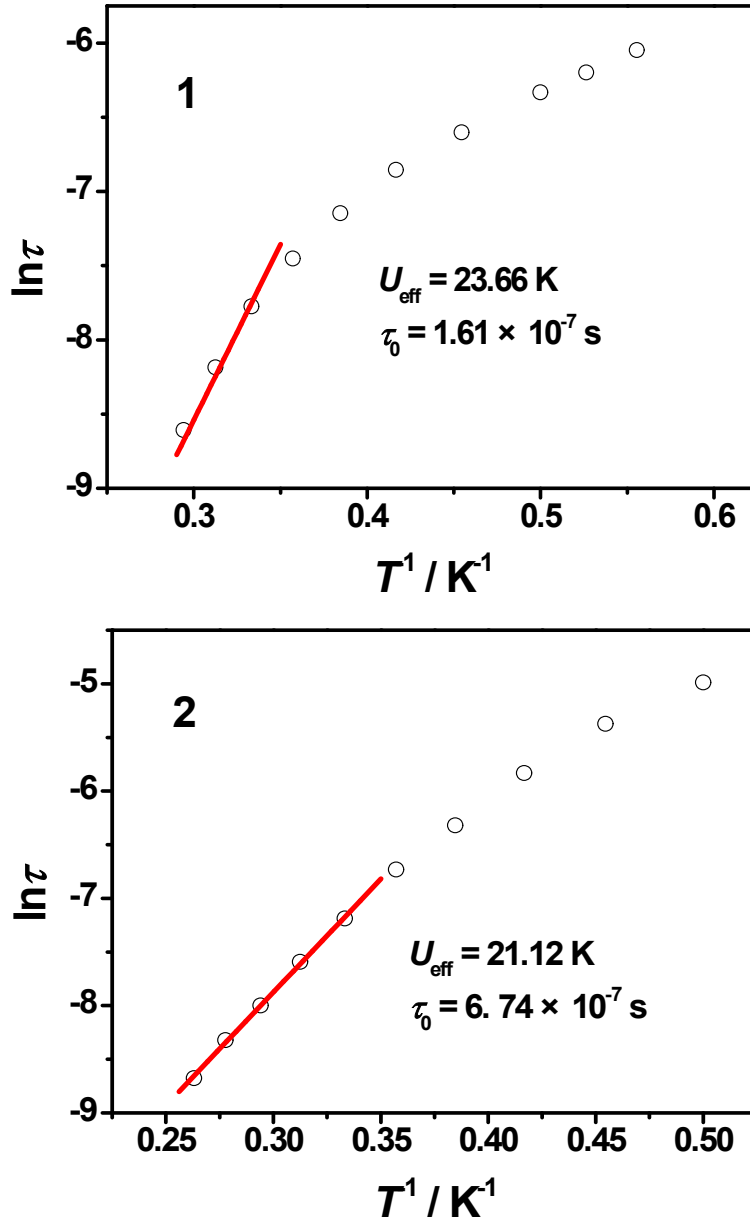

**Fig. S19** Relaxation time of the magnetization  $\ln(\tau)$  vs  $T^{-1}$  plots for **1** and **2**.

At low fields, Raman process is weakly field dependent and thus they have been represented by constant of  $k(T)$ .<sup>S47</sup> In addition, both of the quantum tunneling of the magnetization and the direct processes are strongly affected by even applying a small magnetic field.<sup>S48,S49</sup> Therefore, the field dependence of the relaxation at 1.8 K was analyzed by eq (1),

$$\tau^{-1} = AH^4T + \frac{B_1}{1+B_2H^2} + k(T) \quad (1)$$

where the first term represents direct process, the second term represents quantum tunneling of magnetization and the last term represents Raman processes.

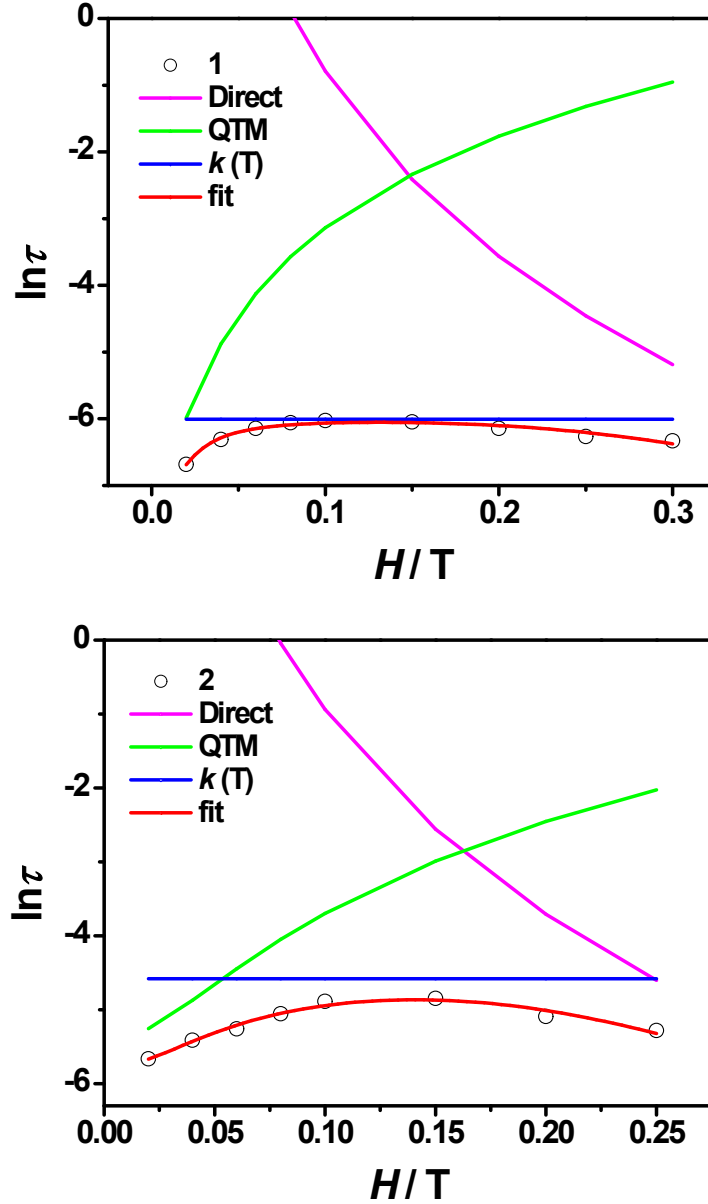

**Fig. S20** Field dependence of the magnetization relaxation rates for **1** under 1.8 K and **2** under 2 K. The red line represents the best fit by using eq (1). The other lines represent the contribution of direct (purple), QTM (green) and Raman processes (blue), respectively.

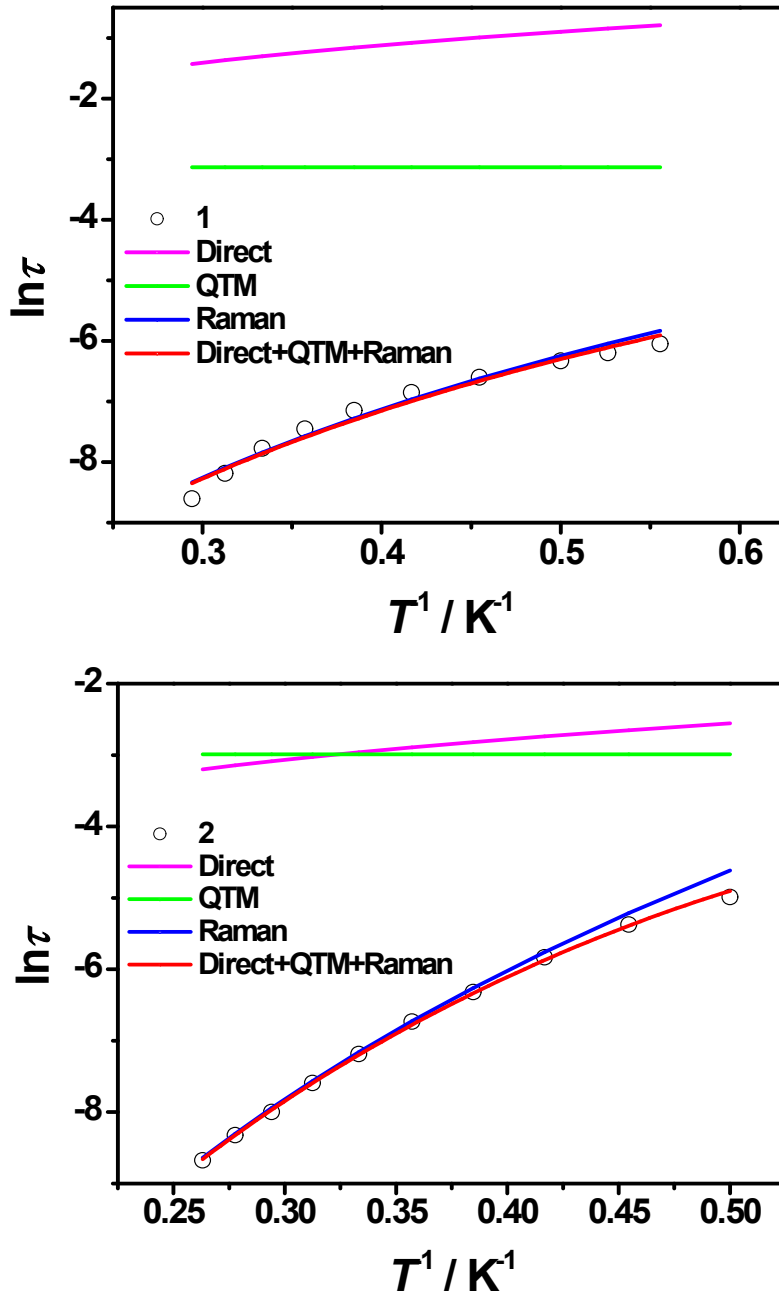

**Fig. S21** Temperature dependence of the magnetization relaxation rates for **1** and **2**. The red line represents the best fit by a model including three possible relaxation processes. The other lines represent the contribution of direct (purple), QTM (green) and Raman processes (blue), respectively.

## References

- S1 Wu, D. Y.; Zhang, X. X.; Huang, P.; Huang, W.; Ruan, M. Y.; Ouyang, Z. W. *Inorg. Chem.*, **2013**, *52*, 10976-10982.
- S2 Xie, Q.-W.; Wu, S.-Q.; Shi, W.-B.; Liu, C.-M.; Cui, A.-L.; Kou, H.-Z. *Dalton Trans.*, **2014**, *43*, 11309-11316.
- S3 Díaz-Torres, R.; Menelaou, M.; Roubeau, O.; Sorrenti, A.; Brandariz-de-Pedro, G.; Sañudo, E. C.; Teat, S. J.; Fraxedas, J.; Ruiz, E.; Aliaga-Alcalde, N. *Chem. Sci.*, **2016**, *7*, 2793-2803.
- S4 Roy, S.; Oyarzabal, I.; Vallejo, J.; Cano, J.; Colacio, E.; Bauza, A.; Frontera, A.; Kirillov, A. M.; Drew, M. G. B.; Das, S. *Inorg. Chem.*, **2016**, *55*, 8502-8513.
- S5 Walsh, J. P. S.; Bowling, G.; Ariciu, A.-M.; Jailani, N. F. M.; Chilton, N. F.; Waddell, P. G.; Collison, D.; Tuna, F.; Higham, L. J.; *Magnetochem.*, **2016**, *2*, 23 (1-10).
- S6 Valigura, D.; Rajnák, C.; Moncol, J.; Titiš, J.; Boča, R. *Dalton Trans.*, **2017**, *46*, 10950-10956.
- S7 Boča, R.; Rajnák, C.; Moncol, J.; Titiš, J.; Valigura, D. *Inorg. Chem.*, **2018**, *57*, 14314-14321.
- S8 Wei, Y.-F.; Ma, X.-F.; Huang, X.-D.; Wen, G.-H.; Jia, J.-G.; Zheng, L.-M. *J. Solid State Chem.*, **2022**, *312*, 123227.
- S9 Nemeč, I.; Fellner, O. F.; Indruchová, B.; Herchel, R. *Materials*, **2022**, *15*, 1064.

- S10 Xia, Z.; Li, Y.; Ji, C.; Jiang, Y.; Ma, C.; Gao, J.; Zhang, J. *Nanomaterials*, **2022**, *12*, 707(1-8).
- S11 Novitchi, G.; Jiang, S. D.; Shova, S.; Rida, F.; Hlavička, I.; Orlita, M.; Wernsdorfer, W.; Hamze, R.; Martins, C.; Suaud, N.; Guihéry, N.; Barra, A.-L.; Train, C. *Inorg. Chem.*, **2017**, *56*, 14809-14822.
- S12 Acharya, A.; Swain, A.; Chakraborty, V.; Kumar, P.; Kumar, J.; Gonzalez, F.; Cador, O.; Pointillart, F.; Rajaraman, G.; Chandrasekhar, V. *Inorg. Chem.*, **2019**, *58*, 10725-10735.
- S13 El-Ghayoury, O. A.; Lloret, F.; Julve, M.; Avarvari, N. *Eur. J. Inorg. Chem.*, **2018**, *3-4*, 449-457.
- S14 Rajnák, C.; Titiš, J.; Moncol, J.; Boča, R. *Dalton Trans.*, **2020**, *49*, 4206-4210.
- S15 Huang, X.-C.; Li, J.-X.; Chen, Y.-Z.; Wang, W.-Y.; Xu, R.; Tao, J.-X.; Shao, D.; Zhang, Y.-Q. *Chem Asian J.*, **2020**, *15*, 1469-1477.
- S16 Zhang, Y.-J.; Yin, L.; Li, J.; Hu, Z.-B.; Ouyang, Z.-W.; Song, Y.; Wang, Z. *RSC Adv.*, **2020**, *10*, 12833-12840.
- S17 Sadhukhan, D.; Ghosh, P.; Gómez-García, C. J.; Rouziers, M. *Magnetochemistry*, **2018**, *4*, 56.
- S18 Wu, Y.-W.; Tian, D.-N.; Ferrando-Soria, J.; Cano, J.; Yin, L.; Ouyang, Z.-W.; Wang, Z.-X.; Luo, S.-C.; Liu X.-Y.; Pardo, E. *Inorg. Chem. Front.*, **2019**, *6*, 848-856.
- S19 Hu, Z.-B.; Jing, Z.-Y.; Li, M.-M.; Yin, L.; Gao, Y.-D.; Yu, F.; Hu, T.-P.; Wang, Z.; Song, Y. *Inorg. Chem.*, **2018**, *57*, 10761-10767.

- S20 Huang, X.-C.; Zhou, C.; Shao, D. Wang, X.-Y. *Inorg. Chem.*, **2014**, *53*, 12671-12673.
- S21 Habib, F.; Korobkov, I.; Murugesu, M. *Dalton Trans.*, **2015**, *44*, 6368-6373.
- S22 Ruamps, R.; Batchelor, L. J.; Maurice, R.; Gogoi, N.; Jiménez-Lozano, P.; Guihéry, N.; de Graaf, C.; Barra, A.-L.; Sutter, J.-P.; Mallah, T. *Chem. Eur. J.* **2013**, *19*, 950-956.
- S23 Chen, L.; Chen, S.-Y.; Sun, Y.-C.; Guo, Y.-M.; Yu, L.; Chen, X.-T.; Wang, Z.; Ouyang, Z. W.; Song, Y.; Xue, Z.-L. *Dalton Trans.*, **2015**, *44*, 11482-11490.
- S24 Huang, X.-C.; Qi, Z.-Y.; Ji, C.-L.; Guo, Y.-M.; Yan, S.-C.; Zhang, Y.-Q.; Shao, D.; Wang, X.-Y. *Dalton Trans.*, **2018**, *47*, 8940-8948.
- S25 Wang, J.; Cui, H.-H.; Zhang, Y.-Q.; Chen, Lei.; Chen, X.-T. *Polyhedron*, **2018**, *154*, 148-155.
- S26 Mondal, A. K.; Mondal, A.; Dey, B.; Konar, S. *Inorg. Chem.*, **2018**, *57*, 9999-10008.
- S27 Antal, P.; Drahoš, B.; Herchel, R.; Trávníček, Z. *Eur. J. Inorg. Chem.* **2018**, *38*, 4286-4297.
- S28 Kopotkov, V. A.; Korchagin, D. V.; Sasnovskaya, V. D.; Gilmutdinov, I. F.; Yagubskii, E. B. *Magnetochemistry*, **2019**, *5*, 58(1-16).
- S29 Mondal, A.; Kharwar, A. K.; Konar, S. *Inorg. Chem.*, **2019**, *58*, 10686-10693.
- S30 Uchida, K.; Cosquer, G.; Sugisaki, K.; Matsuoka, H.; Sato, K.; Breedlove B. K.; Yamashita, M. *Dalton Trans.*, **2019**, *48*, 12023-12030.
- S31 Llunell, M.; Casanova, D.; Cirera, J.; Alemany, P.; Alvarez, S. Shape Program,

Version 2.1, **2013**.

- S32 Neese, F. *Wiley Interdiscip. Rev.: Comput. Mol. Sci.* **2012**, *2*, 73-78.
- S33 Neese, F. Software update: The ORCA program system—Version 5.0, *WIREs Comput. Mol. Sci.* **2022**, *12*, e1606.
- S34 Neese, F. ORCA-an Ab Initio, Density functional and semiempirical program package, 5.0.3, University of Bonn, Bonn, Germany, **2022**.
- S35 Malmqvist, P. A.; Roos, B. O. *Chem. Phys. Lett.* **1989**, *155*, 189-194.
- S36 Herchel, R.; Nemeč, I.; Machata, M.; Trávníček, Z. *Dalton Trans.* **2016**, *45*, 18622-18634.
- S37 Ganyushin, D.; Neese, F. *J. Chem. Phys.* **2006**, *125*, 024103.
- S38 Neese, F. *J. Chem. Phys.* **2005**, *122*, 034107.
- S39 Weigend, F.; Ahlrichs, R. *Phys. Chem. Chem. Phys.* **2005**, *7*, 3297-3305.
- S40 Weigend, F. *Phys. Chem. Chem. Phys.* **2006**, *8*, 1057-1065.
- S41 Zhou, Y.; Tan, P.; Jing, R.; Liu, M.; Xiang, Y.; Yuan, A.; Luo, S.-C.; Cui, H.-H.; Shi, L.; Chen, L. *Cryst. Growth Des.* **2022**, *22*, 6792-6800.
- S42 Noodleman, L. *J. Chem. Phys.* **1981**, *74*, 5737-5743.
- S43 Luo, S.; Nie, D.; Li, Z.; Sun, X.; Hu, L.; Liu, X. *Polyhedron* **2020**, *182*, 114506.
- S44 Luo, S.; Mei, H.; Sun, X.; Zheng, P. *J. Mol. Graph. Model.* **2020**, *97*, 107562.
- S45 Soda, T.; Kitagawa, Y.; Onishi, T.; Takano, Y.; Shigeta, Y.; Nagao, H.; Yoshioka, Y.; Yamaguchi, K. *Chem. Phys. Lett.* **2000**, *319*, 223-230.
- S46 Cole, K. S.; Cole, R. H. *J. Chem. Phys.* **1941**, *9*, 341-351.



- S47 Shrivastava, K. N. *Phys. Status Solidi B* **1983**, *117*, 437-458.
- S48 Abragam, A.; Bleaney, B. *Electron paramagnetic resonance of transition ions*,  
Dover, New York, **1986**.
- S49 Lucaccini, E.; Sorace, L.; Perfetti, M.; Costes, J.-P.; Sessoli, R. *Chem. Commun.* **2014**, *50*, 1648-1651.
